# Supplementary material for: Mechanical Force-Induced Blue-Shifted and Enhanced Emission for AIEgens
Source: MDPI journal article supplement (doi:10.3390/bios12111055), 2022-11-21
Supplement: s1 [file s1]

## Supporting Information

# Mechanical Force-Induced Blue-Shifted and Enhanced Emission for AIEgens

**Chang-Sheng Guo <sup>1,†</sup>, Xiao-Long Su <sup>1,†</sup>, Yu-Ting Yin <sup>1</sup>, Bo-Xuan Zhang <sup>1</sup>, Xin-Yi Liu <sup>1</sup>, Rui-Peng Wang <sup>1</sup>, Pu Chen <sup>1</sup>, Hai-Tao Feng <sup>1,\*</sup> and Ben-Zhong Tang <sup>2,\*</sup>**

<sup>1</sup> AIE Research Center, Shaanxi Key Laboratory of Phytochemistry, College of Chemistry and Chemical Engineering, Baoji University of Arts and Sciences, Baoji 721013, China

<sup>2</sup> Shenzhen Institute of Molecular Aggregate Science and Engineering, School of Science and Engineering, The Chinese University of Hong Kong, Shenzhen 518172, China

\* Correspondence: haitaofeng907@163.com (H.-T.F.); tangbenz@cuhk.edu.cn (B.Z.T.)

† These authors contributed equally to this work.

## 1. General information

**Materials:** All reagents and solvents were chemical pure (CP) grade or analytical reagent (AR) grade and were used as received unless otherwise indicated.

**Measurements:**  $^1\text{H}$  NMR and  $^{13}\text{C}$  NMR spectra were obtained by an Agilent NMR Systems 400MHz NMR Spectrometer at 298 K. High resolution mass spectra (HRMS) were obtained by use of a Bruker Compact TOF mass spectrometer in electrospray ionization mode (ESI+). Absorption spectra were recorded on a YOKU INSTRUMENT TS2023 UV-Vis spectrophotometer. Solid absorption spectra were recorded on a Perkin Elmer Lambda 1050+ spectrophotometer. Fluorescence spectra were collected on a HORIBA FLOUROMAX-4 fluorophotometer at 298 K. Powder X-ray diffraction (PXRD) was collected on Rigaku DMAX U1TIMAIV diffractometer using  $\text{CuK}\alpha$  irradiation. The lifetimes were measured on an Edinburgh FLS1000 fluorescence spectrophotometer equipped with a continuous xenon lamp (Xe1). The surface morphology of the samples was analyzed using scanning electron microscope (SEM, FEI Quanta FEG 250). Single crystal data were collected on a Bruker Smart APEXII CCD diffractometer using graphite monochromated  $\text{Mo K}\alpha$  radiation ( $\lambda = 0.71073 \text{ \AA}$ ) or  $\text{Cu K}\alpha$  radiation ( $\lambda = 1.54184 \text{ \AA}$ ).

### Computational details

Frontier molecular orbitals were calculated by Gaussian 09 software using density functional theory at B3LYP/6-311G\* level.

## 2. General procedure for the synthesis of cyanostilbene-based AIEgens 1-6.

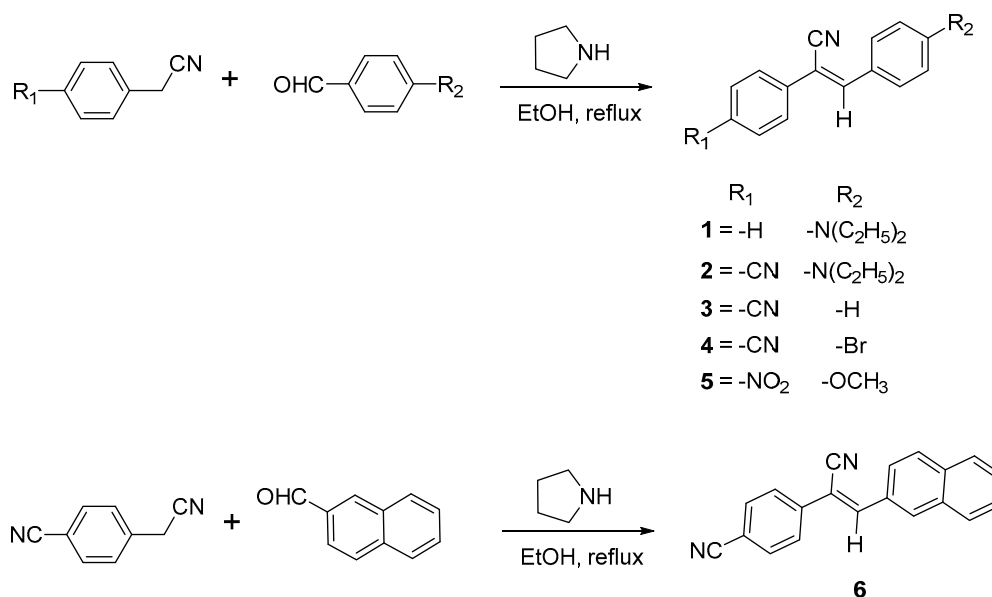

Scheme S1. The synthetic procedure of molecules **1-6**.

An appropriate benzeneacetonitrile (3 mmol) and benzaldehyde (3 mmol) and pyrrolidine (1~3 drops) were dissolved in toluene (15 mL) and the mixture was stirred at 80 °C for 6 h, and then cooled to 25 °C. The crude product was obtained by filtration. Finally, the crude product was recrystallized in DCM/ethanol mixture (v/v = 1/1) to give the corresponding product.

According to the general procedure, the product **1** was obtained in (0.66 g, yield 80%). <sup>1</sup>H NMR (400 MHz, CDCl<sub>3</sub>) δ = 7.85 (d, *J* = 9.2 Hz, 2 H), 7.65 - 7.62 (m, 2 H), 7.43 - 7.40 (m, 3 H), 7.33 - 7.29 (m, 1 H), 6.70 (d, *J* = 9.2 Hz, 2 H), 3.43 (q, *J* = 7.2 Hz, 4 H), 1.22 (t, *J* = 8.2 Hz, 6 H). <sup>13</sup>C NMR (100 MHz, CDCl<sub>3</sub>) δ 149.50, 142.65, 135.85, 131.74, 128.98, 127.93, 125.53, 120.99, 119.72, 111.24, 103.90, 44.64, 12.74. ESI<sup>+</sup> HRMS *m/z* calcd. for C<sub>19</sub>H<sub>21</sub>N<sub>2</sub> 277.1699 [M+H]<sup>+</sup>, found 277.1697 [M+H]<sup>+</sup>.

According to the general procedure, the product **2** was obtained in (0.74 g, yield 82%). <sup>1</sup>H NMR (400 MHz, CDCl<sub>3</sub>) δ 7.87 (d, *J* = 9.2 Hz, 2 H), 7.71 (d, *J* = 8.8 Hz, 2 H), 7.66 (d, *J* = 8.8 Hz, 2 H), 7.46 (s, 1 H), 6.70 (d, *J* = 9.2 Hz, 2 H), 3.45 (q, *J* = 7.2 Hz, 4 H), 1.23 (t, *J* = 7.2 Hz, 6 H). <sup>13</sup>C NMR (100 MHz, CDCl<sub>3</sub>) δ 150.15, 144.64, 140.28, 132.55, 132.35, 125.55, 120.13, 118.83, 118.63, 111.17, 110.74, 101.22, 44.57, 12.55. ESI<sup>+</sup> HRMS *m/z* calcd. for C<sub>20</sub>H<sub>20</sub>N<sub>3</sub> 302.1652 [M+H]<sup>+</sup>, found 302.1644 [M+H]<sup>+</sup>.

According to the general procedure, the product **3** was obtained in (0.60 g, yield 81%).

$^1\text{H}$  NMR (400 MHz,  $\text{CDCl}_3$ )  $\delta$  7.94 – 7.91 (m, 2 H), 7.81 – 7.78 (m, 2 H), 7.76 – 7.73 (m, 2 H), 7.63 (s, 1 H), 7.51 – 7.48 (m, 3 H).  $^{13}\text{C}$  NMR (100 MHz,  $\text{CDCl}_3$ )  $\delta$  145.03, 138.94, 133.12, 132.97, 131.68, 129.79, 129.31, 126.69, 118.31, 117.28, 112.89, 110.10. ESI<sup>+</sup> HRMS  $m/z$  calcd. for  $\text{C}_{16}\text{H}_{10}\text{N}_2\text{Na}$  253.0736  $[\text{M}+\text{Na}]^+$ , found 253.0736  $[\text{M}+\text{Na}]^+$ .

According to the general procedure, the product **4** was obtained in (0.85 g, yield 92%).

$^1\text{H}$  NMR (400 MHz,  $\text{CDCl}_3$ )  $\delta$  7.80 – 7.77 (m, 4 H), 7.76 – 7.73 (m, 2 H), 7.65 – 7.61 (m, 2 H), 7.56 (s, 1 H).  $^{13}\text{C}$  NMR (100 MHz,  $\text{CDCl}_3$ )  $\delta$  143.50, 138.58, 133.02, 132.62, 131.94, 131.07, 126.70, 126.21, 118.21, 117.03, 113.13, 110.77. ESI<sup>+</sup> HRMS  $m/z$  calcd. for  $\text{C}_{16}\text{H}_9\text{BrNa}$  330.9841  $[\text{M}+\text{Na}]^+$ , found 330.9841  $[\text{M}+\text{Na}]^+$ .

According to the general procedure, the product **5** was obtained in (0.80 g, yield 95%).

$^1\text{H}$  NMR (400 MHz,  $\text{CDCl}_3$ )  $\delta$  8.28 (d,  $J$  = 8.8 Hz, 2 H), 7.94 (d,  $J$  = 8.8 Hz, 2 H), 7.81 (d,  $J$  = 8.8 Hz, 2 H), 7.60 (s, 1 H), 7.01 (d,  $J$  = 8.8 Hz, 2 H), 3.89 (s, 3 H).  $^{13}\text{C}$  NMR (100 MHz,  $\text{CDCl}_3$ )  $\delta$  162.56, 147.66, 145.14, 141.23, 132.07, 126.47, 125.83, 124.44, 117.85, 114.80, 106.33, 55.68. ESI<sup>+</sup> HRMS  $m/z$  calcd. for  $\text{C}_{16}\text{H}_{12}\text{O}_3\text{Na}$  303.0740  $[\text{M}+\text{Na}]^+$ , found 303.0739  $[\text{M}+\text{Na}]^+$ .

According to the general procedure, the product **6** was obtained in (0.67 g, yield

80%).  $^1\text{H}$  NMR (400 MHz,  $\text{CDCl}_3$ )  $\delta$  8.33 (s, 1 H), 8.12 – 8.10 (dd,  $J$  = 8.8, 2.0 Hz, 1 H), 7.95 – 7.92 (d,  $J$  = 9.2 Hz, 2 H), 7.89 – 7.87 (m, 1 H), 7.84 – 7.81 (m, 2 H), 7.77 (s, 1 H), 7.76 – 7.73 (m, 2 H), 7.62 – 7.54 (m, 2 H).  $^{13}\text{C}$  NMR (100 MHz,  $\text{CDCl}_3$ )  $\delta$  144.97, 139.07, 134.69, 133.15, 132.96, 131.57, 130.63, 129.15, 129.09, 128.41, 127.98, 127.23, 126.65, 125.19, 118.34, 117.50, 112.80, 109.87. ESI<sup>+</sup> HRMS  $m/z$  calcd. for  $\text{C}_{20}\text{H}_{12}\text{N}_2\text{Na}$  303.0893  $[\text{M}+\text{Na}]^+$ , found 303.0889  $[\text{M}+\text{Na}]^+$ .

### 3. Characteristic Spectra

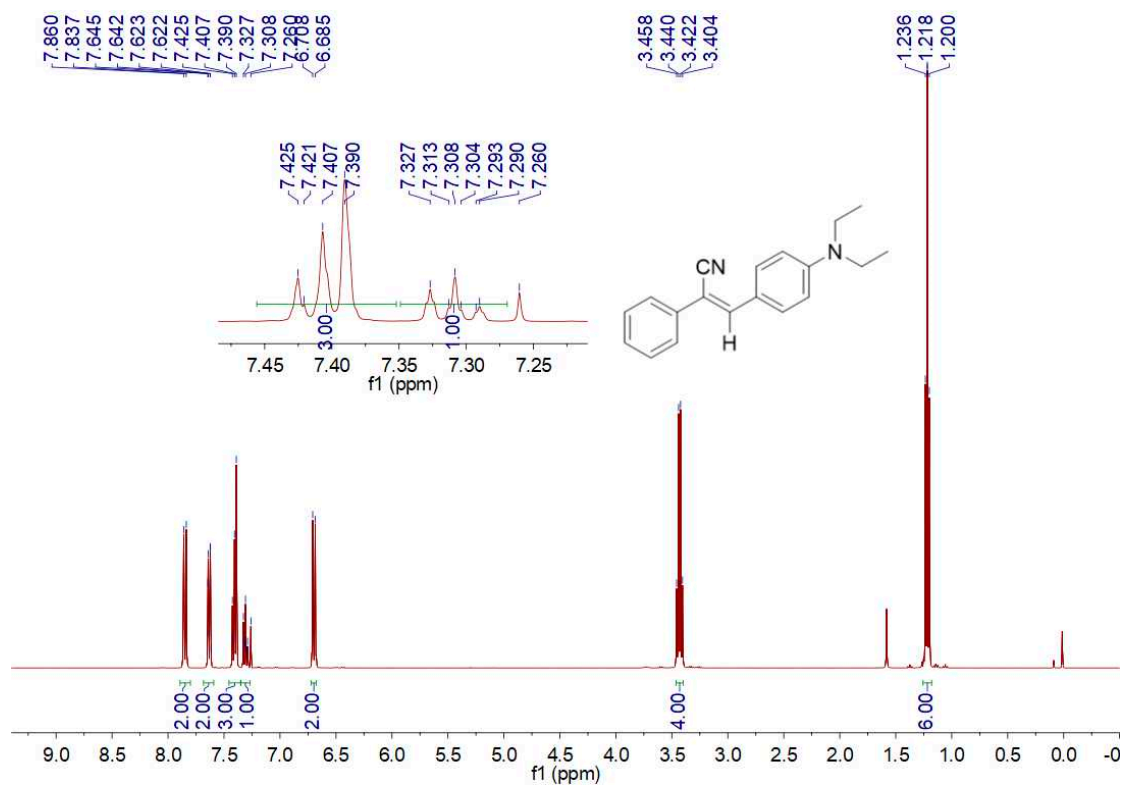

Figure S1. <sup>1</sup>H NMR spectra of **1** (in CDCl<sub>3</sub>).

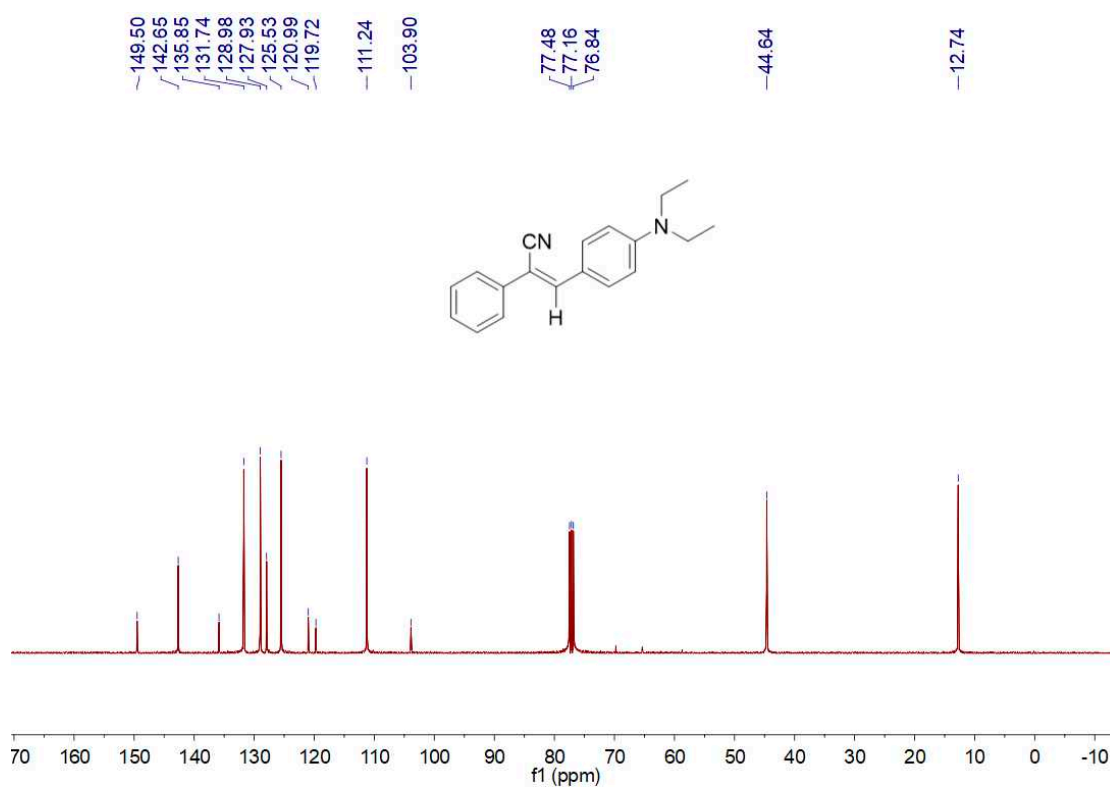

Figure S2. <sup>13</sup>C NMR spectra of **1** (in CDCl<sub>3</sub>).

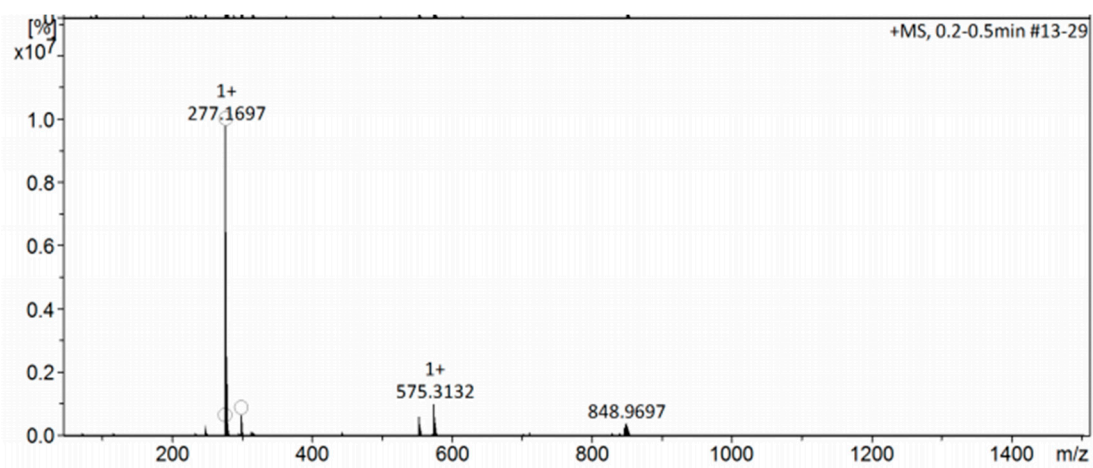

Figure S3. HRMS spectrum of 1.

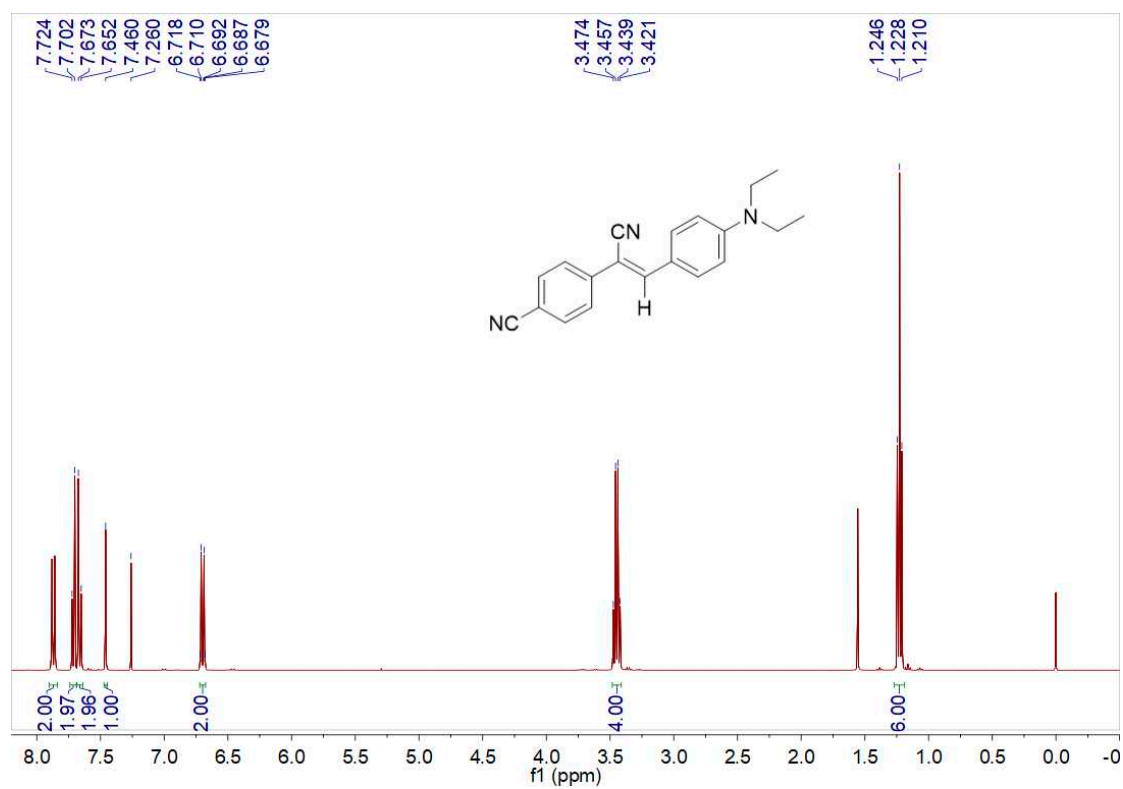

Figure S4 <sup>1</sup>H NMR spectra of 2 (in CDCl<sub>3</sub>).

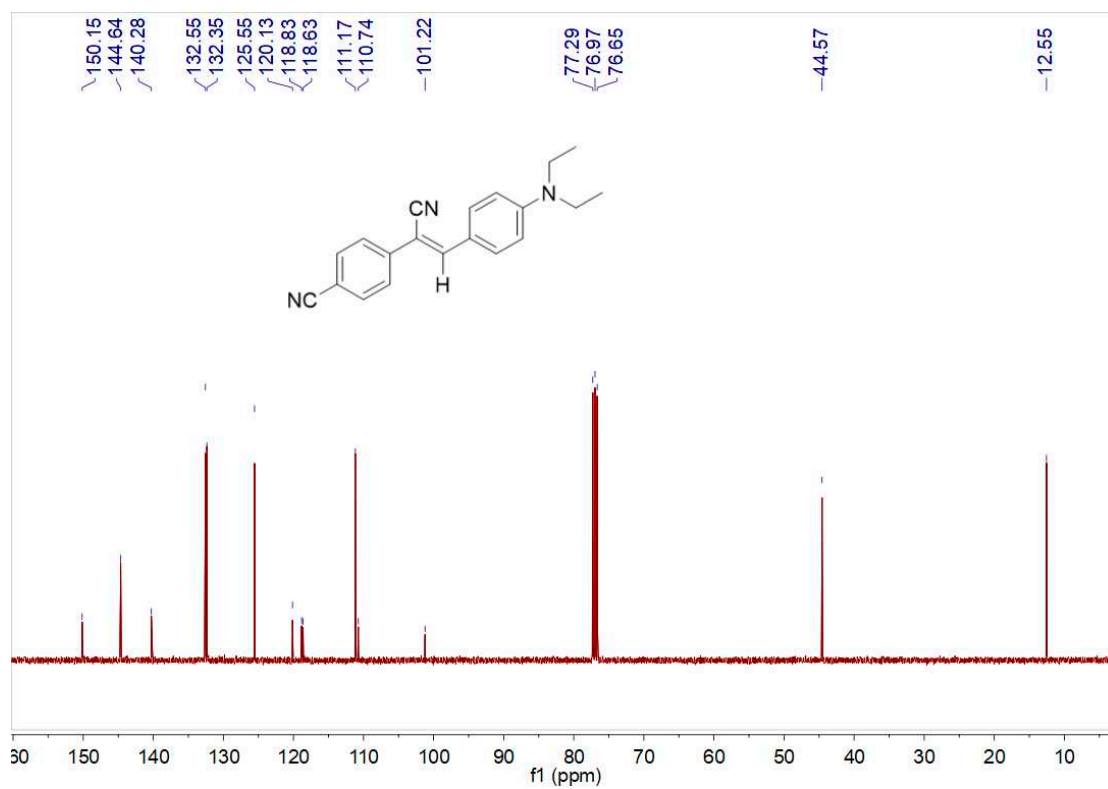

Figure S5. <sup>13</sup>C NMR spectra of **2** (in CDCl<sub>3</sub>).

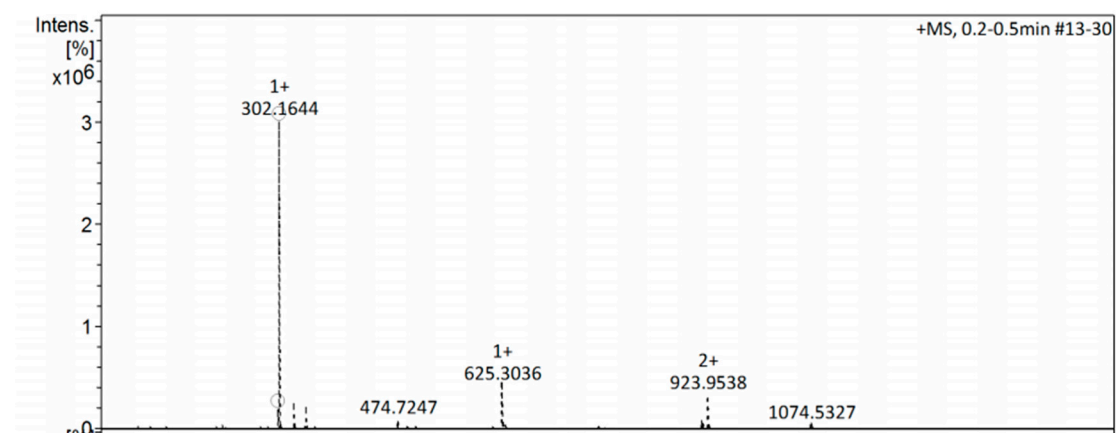

Figure S6. HRMS spectrum of **2**.

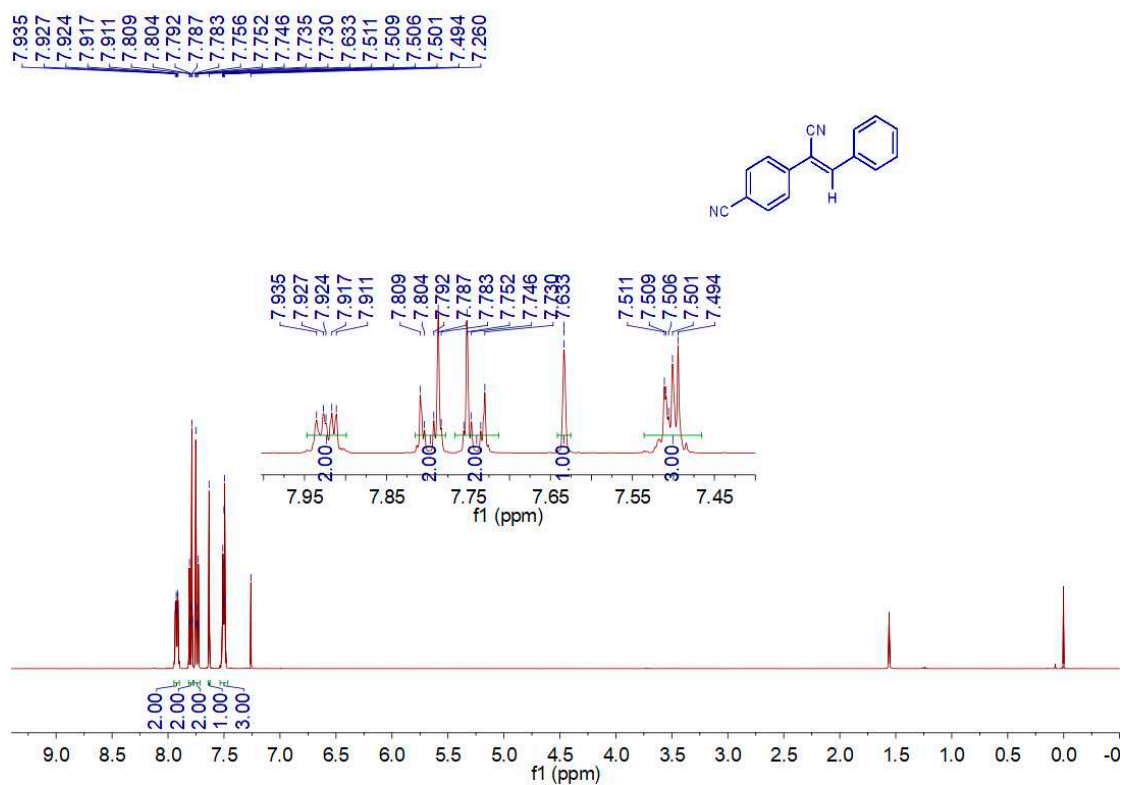

Figure S7. <sup>1</sup>H NMR spectra of **3** (in CDCl<sub>3</sub>).

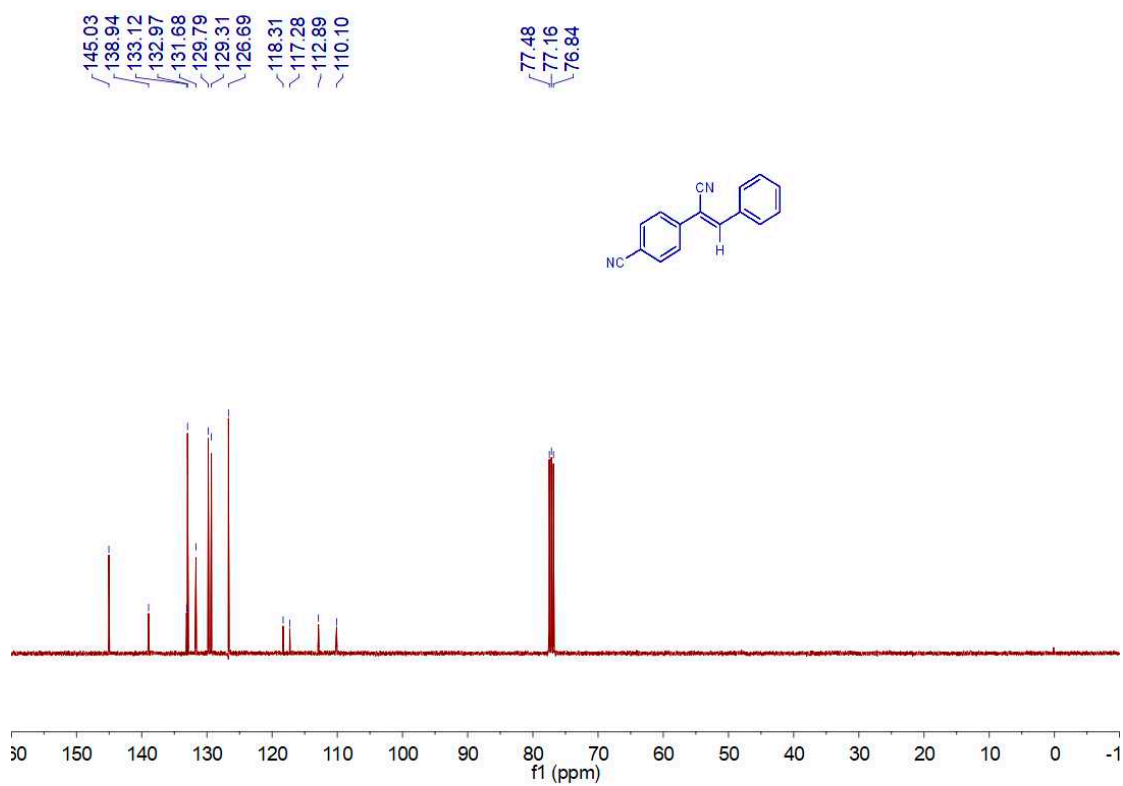

Figure S8. <sup>13</sup>C NMR spectra of **3** (in CDCl<sub>3</sub>).



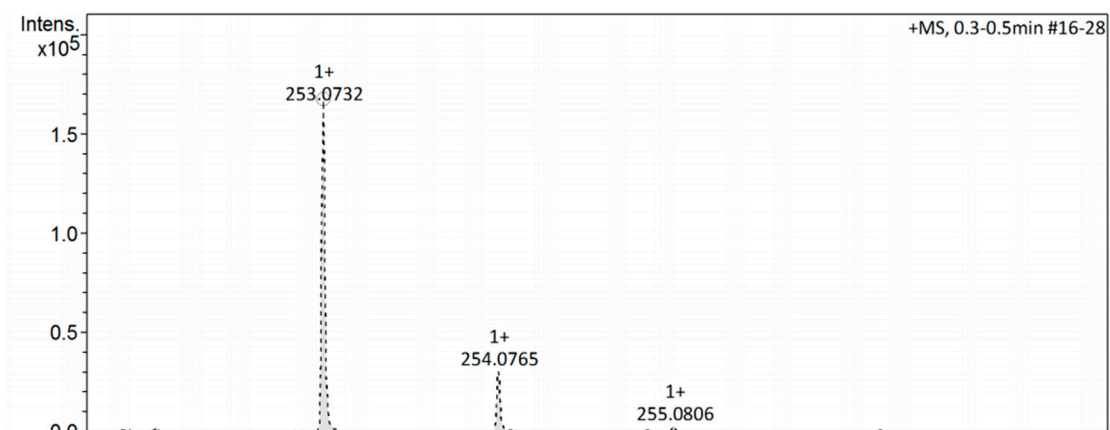

Figure S9. HRMS spectrum of **3**.

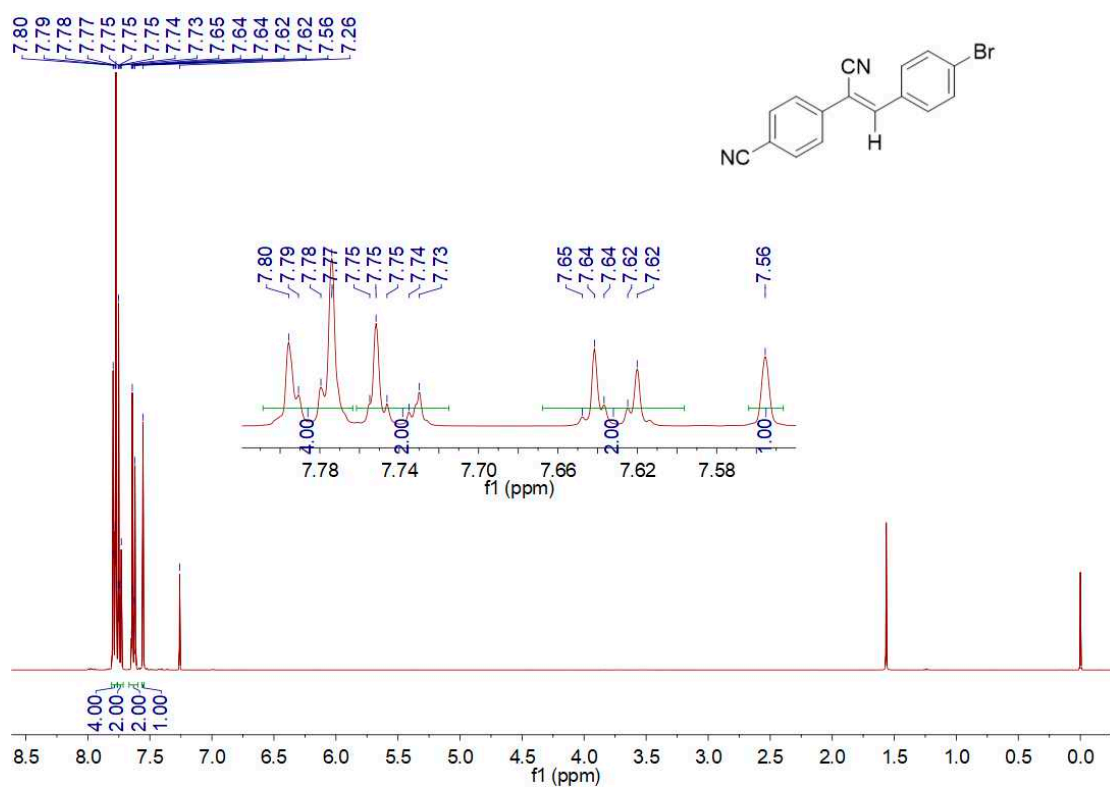

Figure S10. <sup>1</sup>H NMR spectra of **4** (in CDCl<sub>3</sub>).

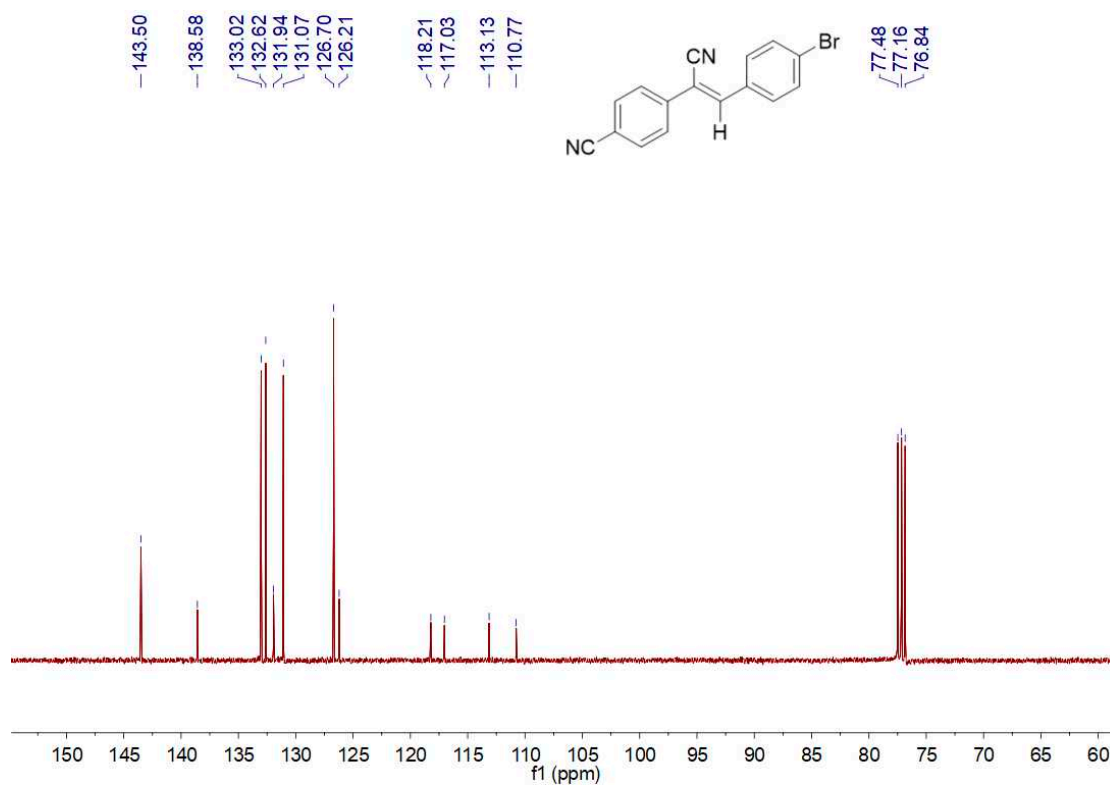

Figure S11. <sup>13</sup>C NMR spectra of **4** in CDCl<sub>3</sub>.

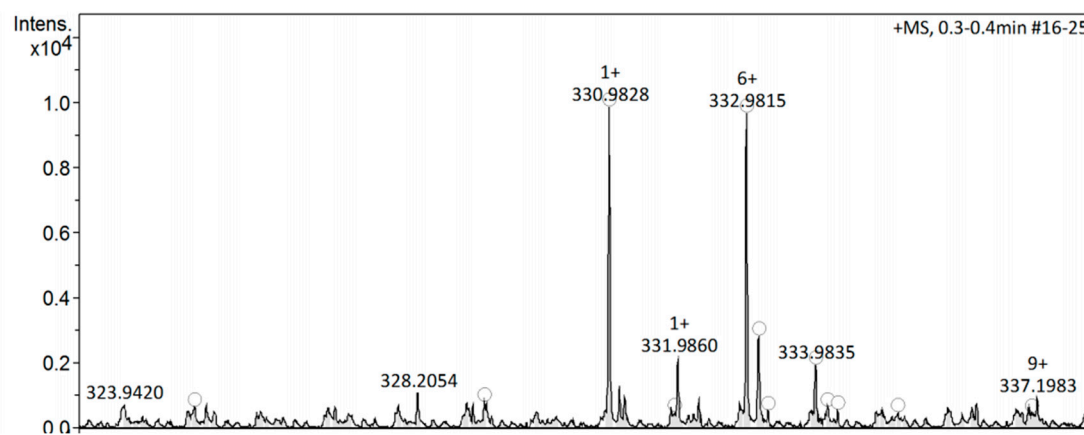

Figure S12. HRMS spectrum of **4**.

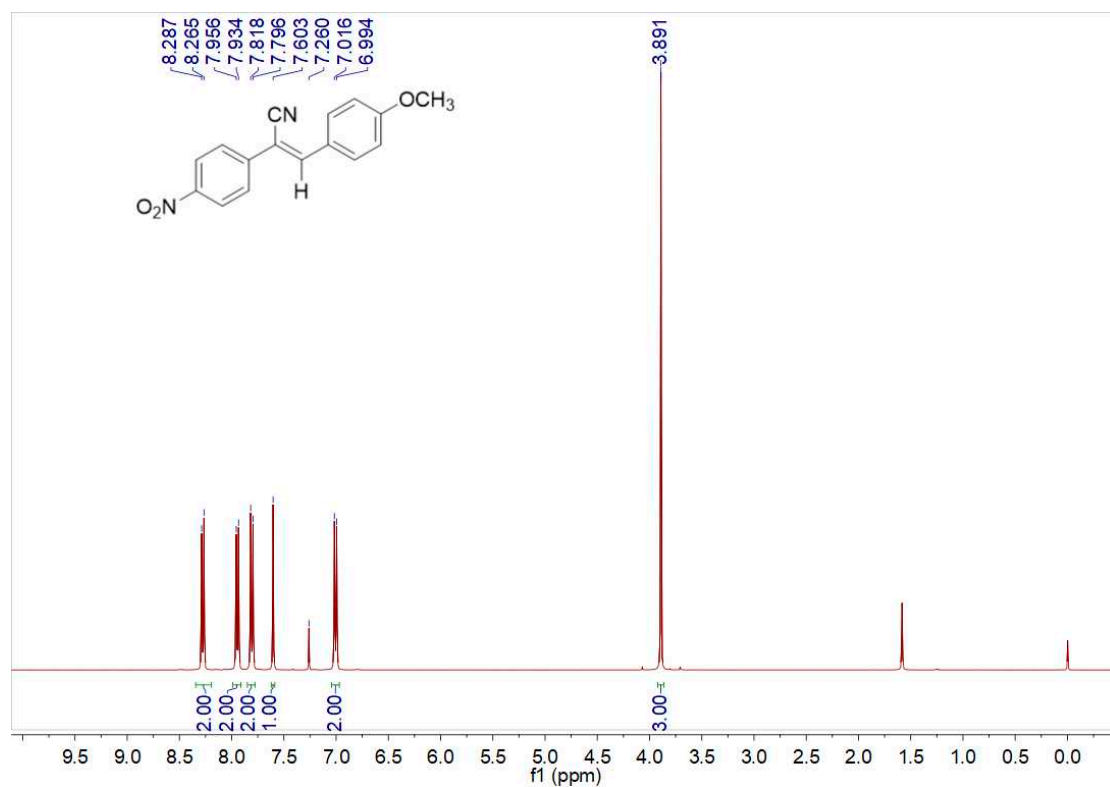

Figure S13. <sup>1</sup>H NMR spectra of **5** in CDCl<sub>3</sub>.

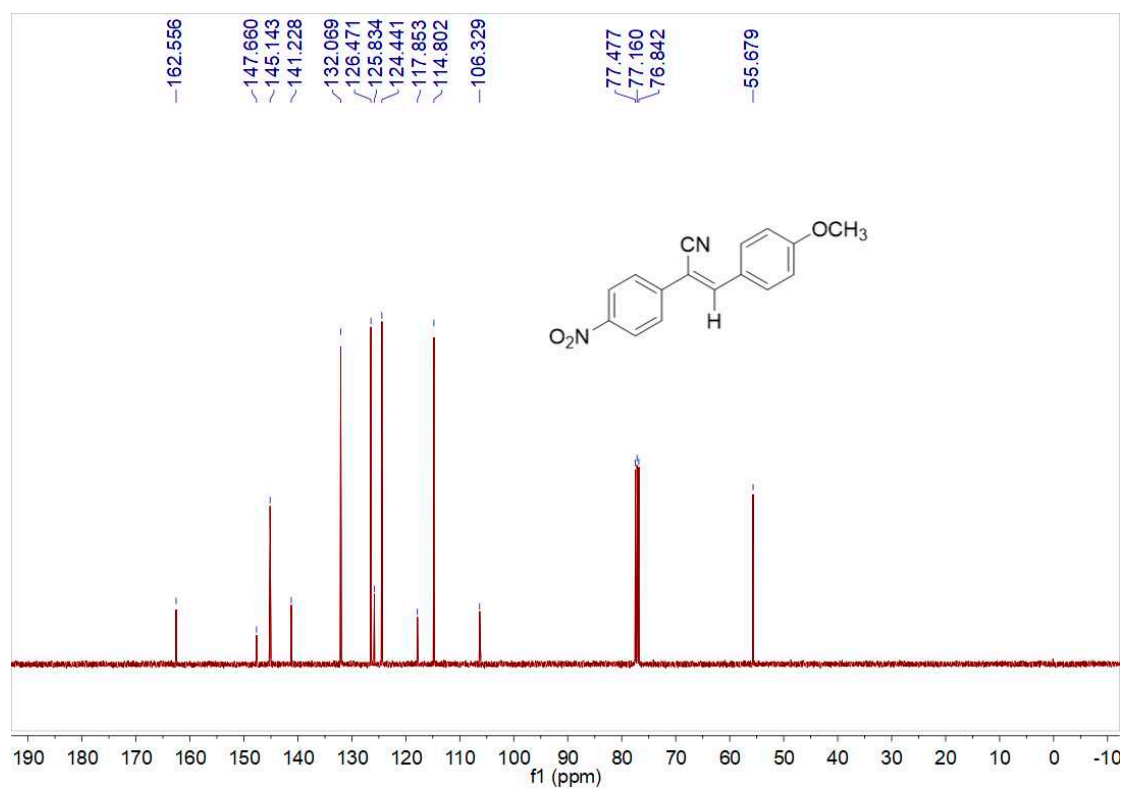

Figure S14. <sup>13</sup>C NMR spectra of **5** in CDCl<sub>3</sub>.

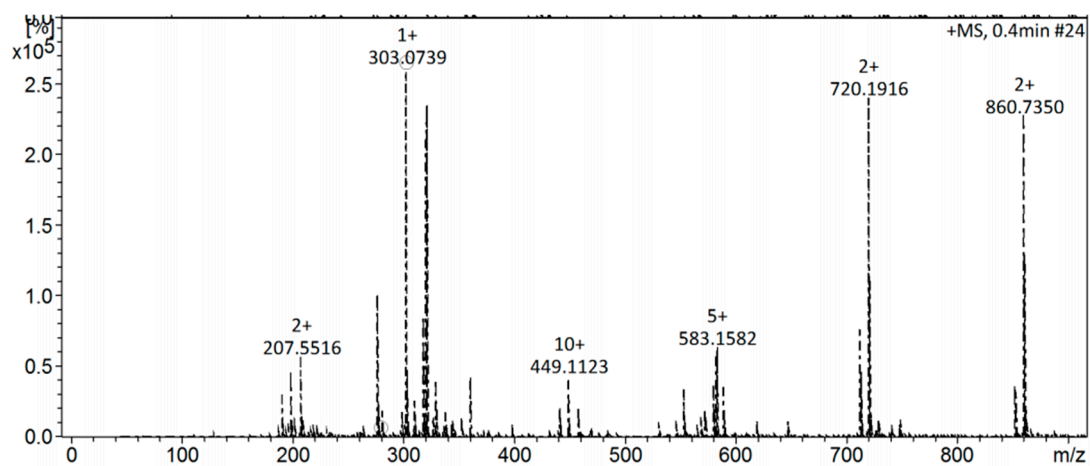

Figure S15. HRMS spectrum of 5.

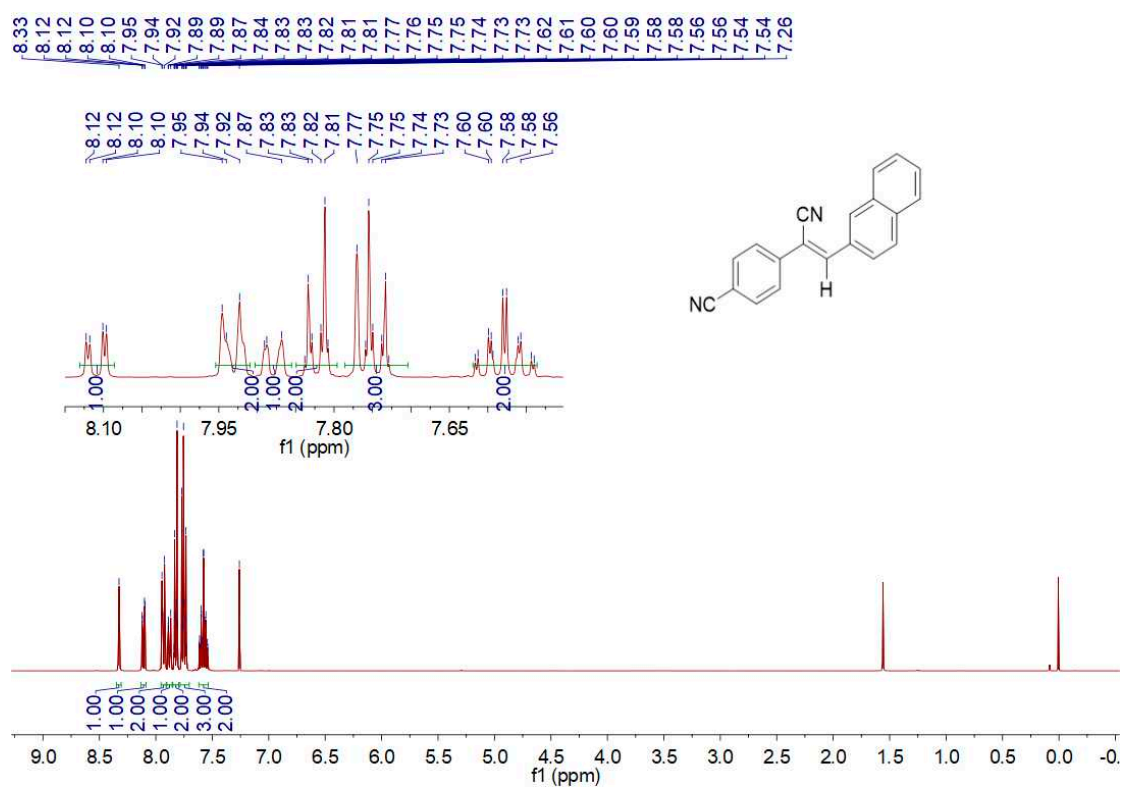

Figure S16.  $^1\text{H}$  NMR spectra of 6 in  $\text{CDCl}_3$ .

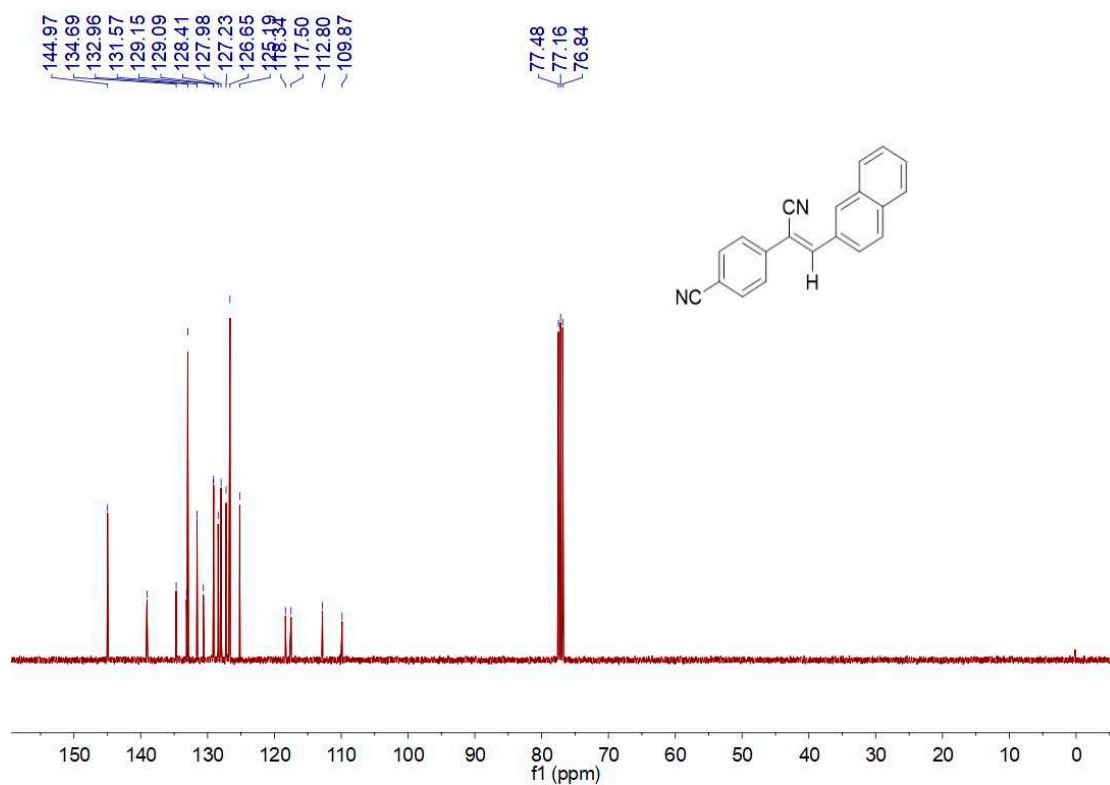

Figure S17. <sup>13</sup>C NMR spectra of **6** in CDCl<sub>3</sub>.

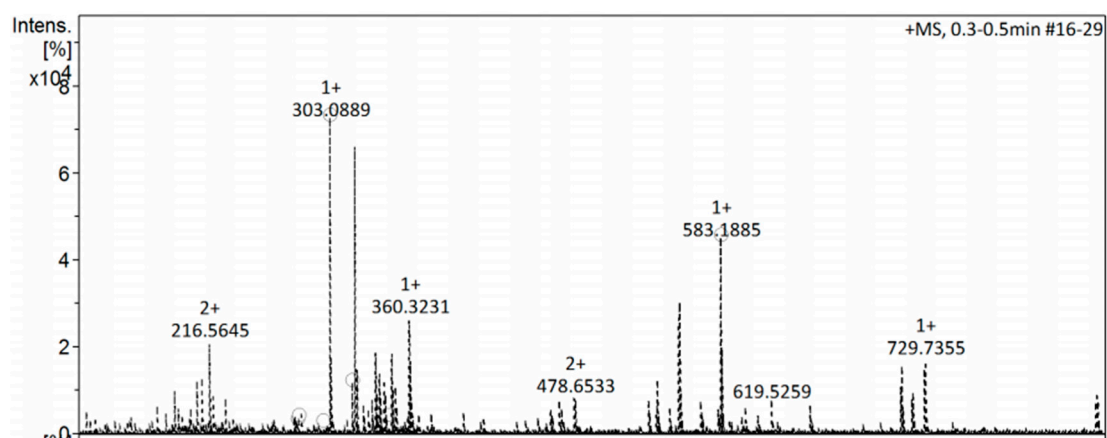

Figure S18. HRMS spectrum of **6**.

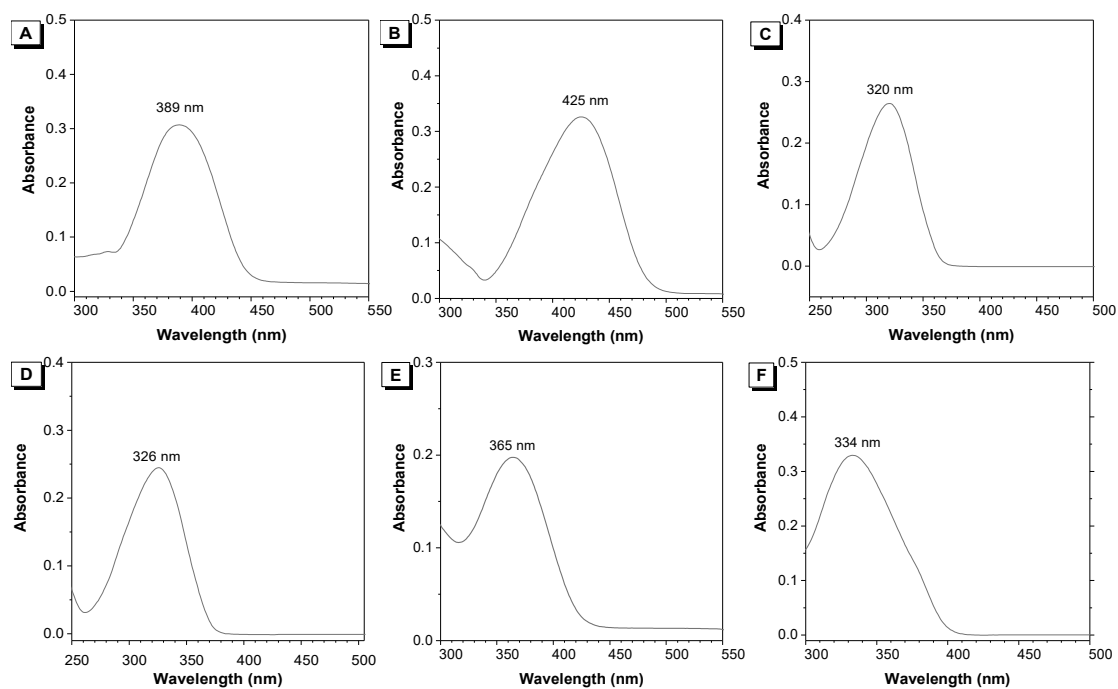

Figure S19. (A-F) Absorption spectra of molecules **1-6** in THF solution,  $c = 1 \times 10^{-5}$  M.

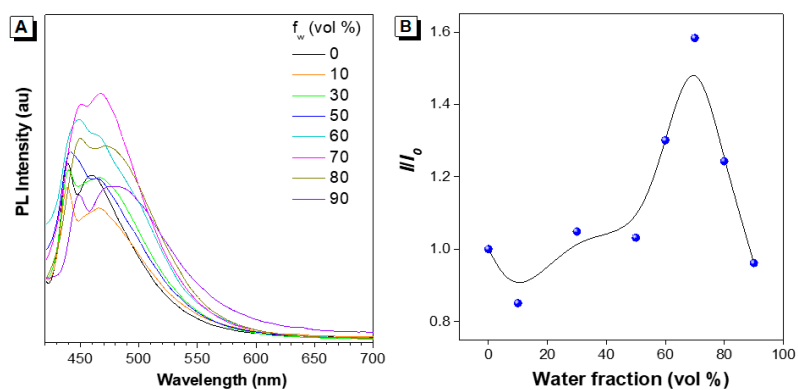

Figure S20. (A) PL spectra of **1** in THF and THF/water mixture with different water fractions. (B) PL intensity ratio of  $I/I_0$  in different THF/water mixtures,  $c = 1 \times 10^{-5}$  M.

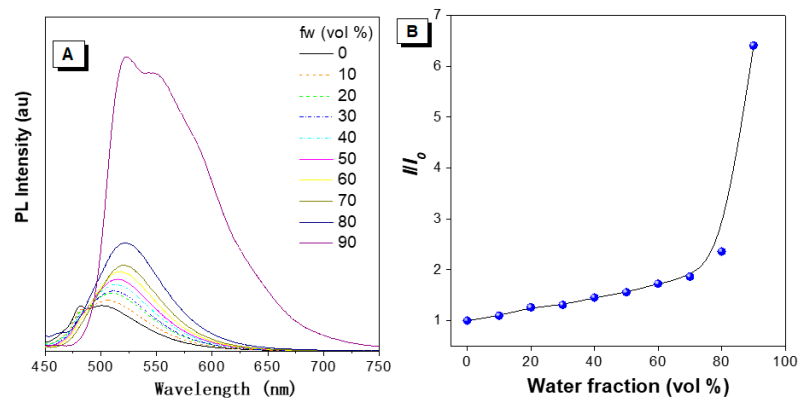

Figure S21. (A) PL spectra of **2** in THF and THF/water mixture with different water fractions. (B) PL intensity ratio of  $I/I_0$  in different THF/water mixtures,  $c = 1 \times 10^{-5}$  M.

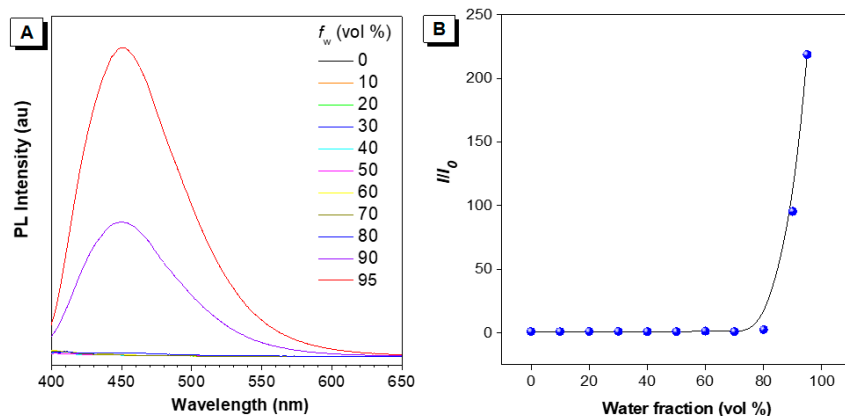

Figure S22. (A) PL spectra of **3** in THF and THF/water mixture with different water fractions. (B) PL intensity ratio of  $I/I_0$  in different THF/water mixtures,  $c = 1 \times 10^{-5}$  M.

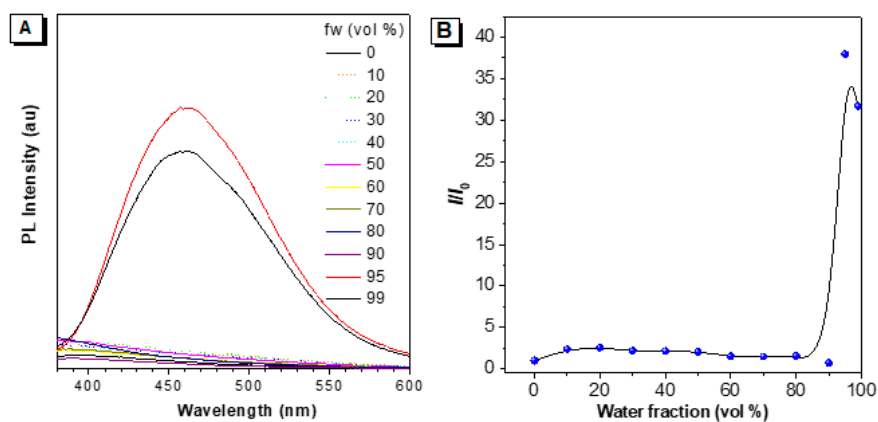

Figure S23. (A) PL spectra of **4** in THF and THF/water mixture with different water fractions. (B) PL intensity ratio of  $I/I_0$  in different THF/water mixtures,  $c = 1 \times 10^{-5}$  M.

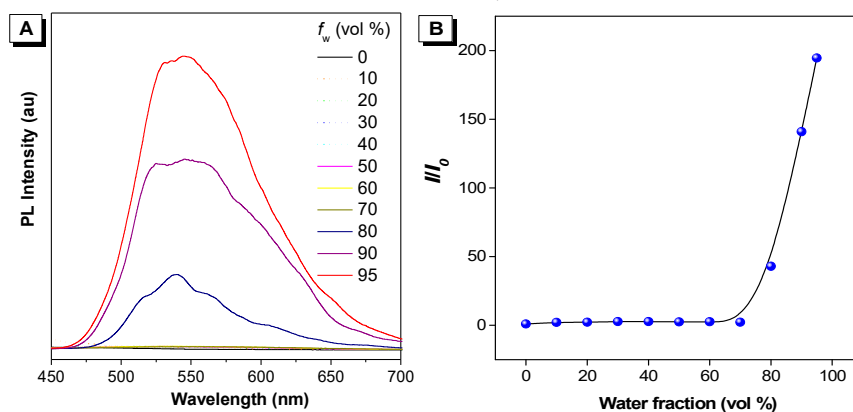

Figure S24. (A) PL spectra of **5** in THF and THF/water mixture with different water fractions. (B) PL intensity ratio of  $I/I_0$  in different THF/water mixtures,  $c = 1 \times 10^{-5}$  M.

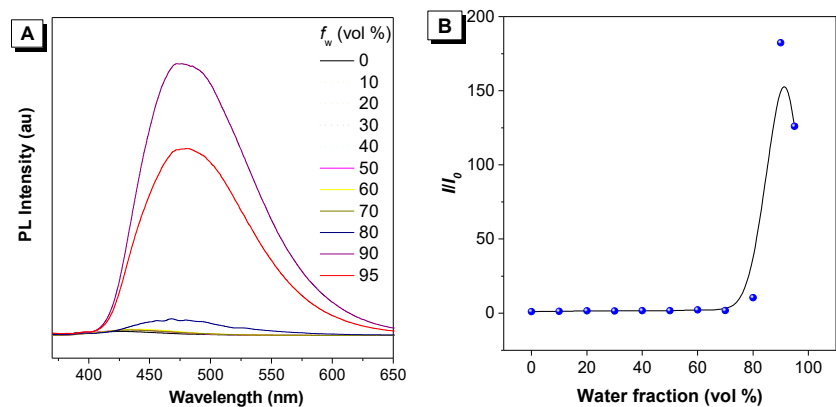

Figure S25. (A) PL spectra of **6** in THF and THF/water mixture with different water fractions. (B) PL intensity ratio of  $I/I_0$  in different THF/water mixtures,  $c = 1 \times 10^{-5}$  M.

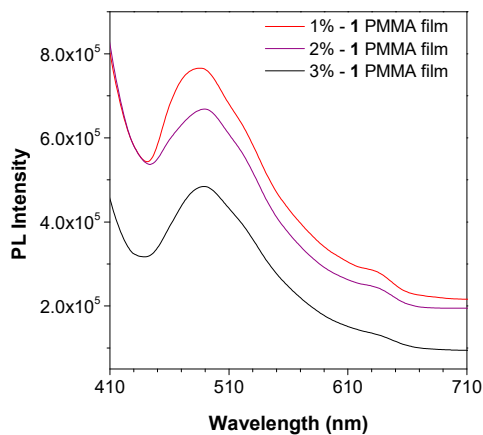

Figure S26. PL spectra of 1, 2, 3 wt% **1**-loaded PMMA film.

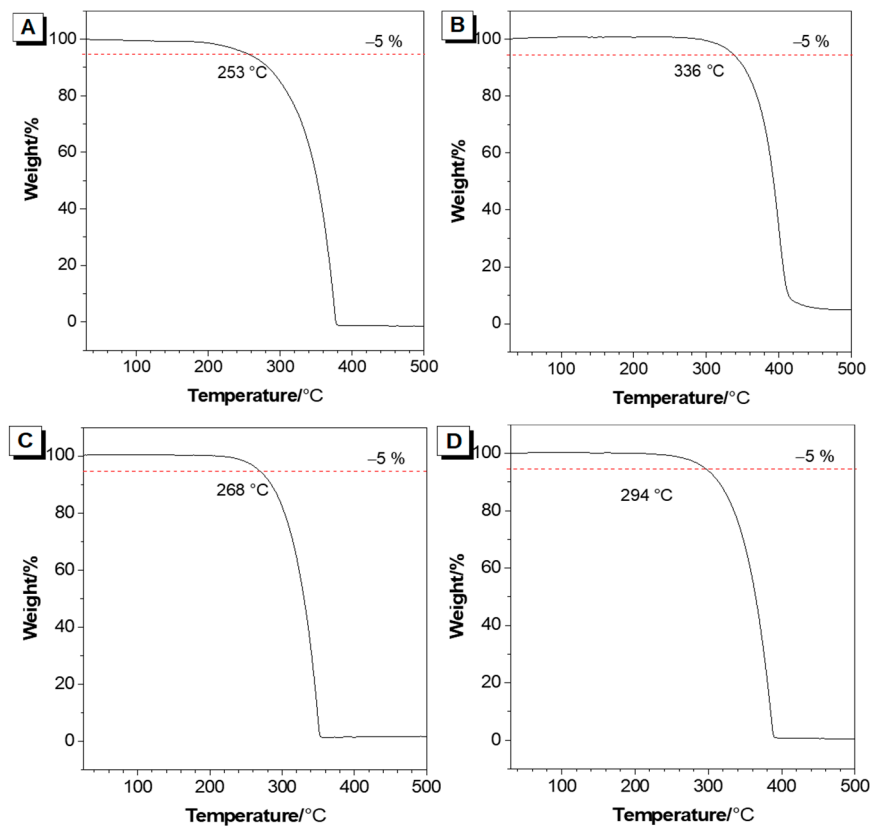



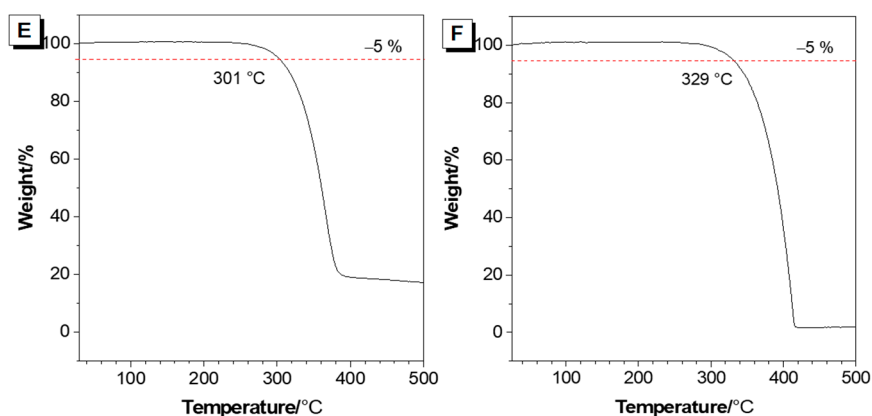

Figure S27. (A-F) Thermogravimetric analysis (TGA) of solids 1-6.

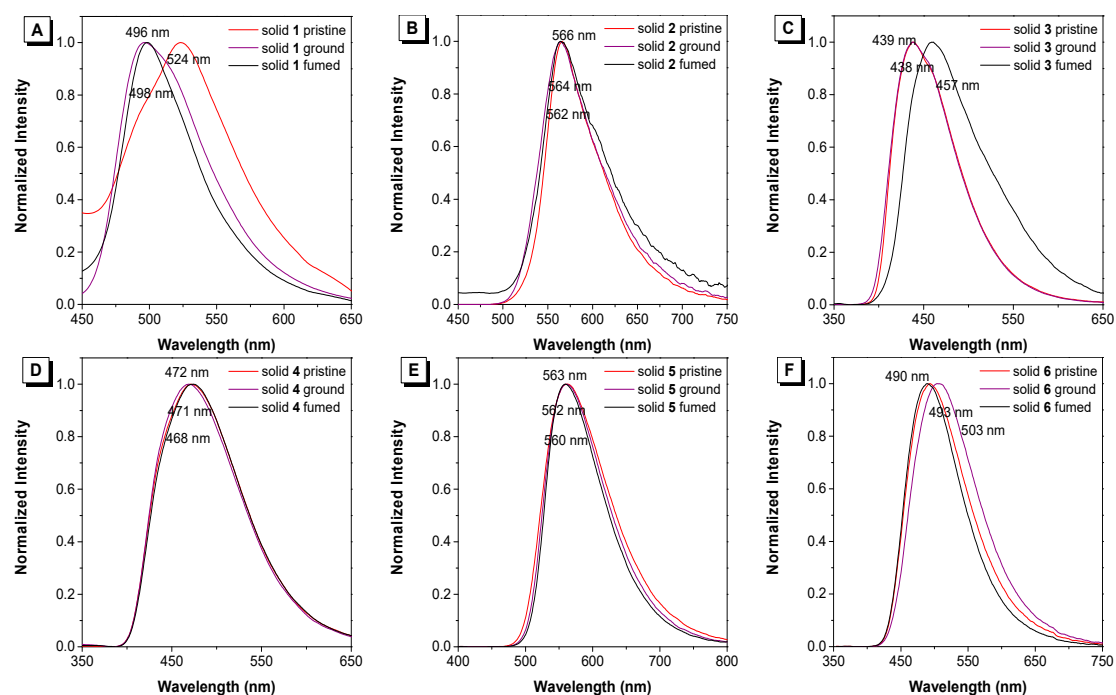

Figure S28. PL spectra of molecules 1-6 as pristine and ground solids. Molecule 1 (Excitation wavelength = 389 nm), molecule 2 (Excitation wavelength = 425 nm), molecule 3 (Excitation wavelength = 320 nm), molecule 4 (Excitation wavelength = 326 nm), molecule 5 (Excitation wavelength = 365 nm), molecule 6 (Excitation wavelength = 334 nm).

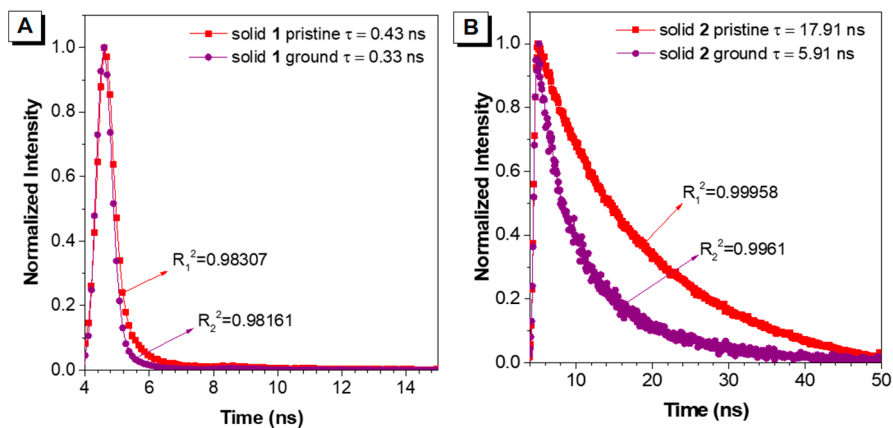

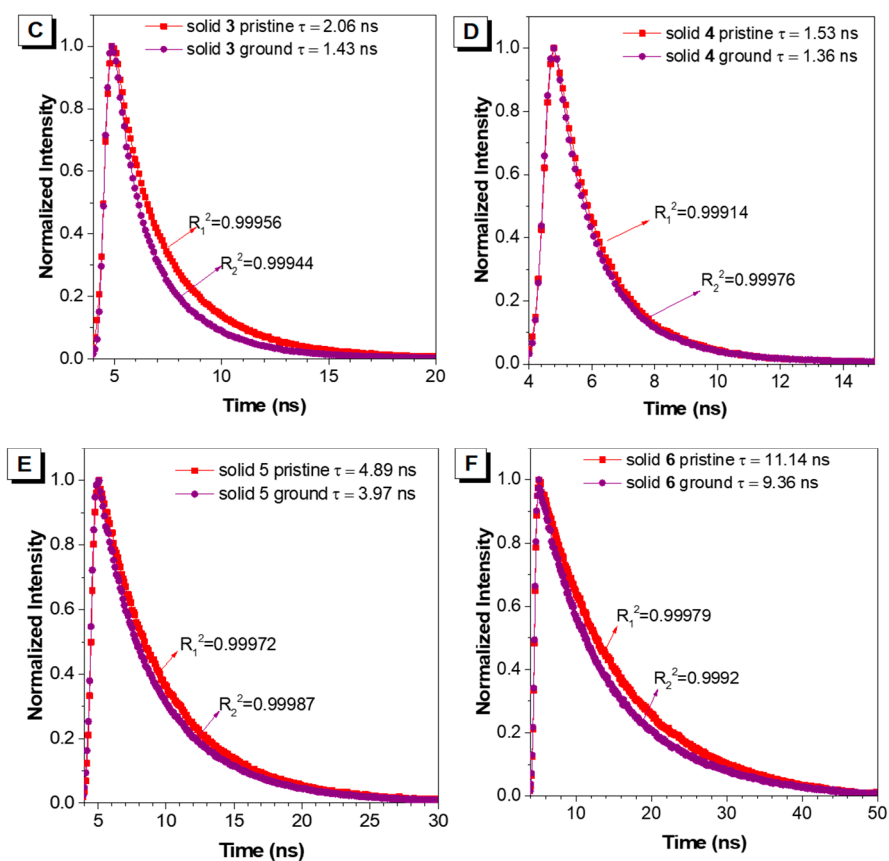

Figure S29. (A-F) Transient PL decay curves of solids 1-6 before and after anisotropic grinding.

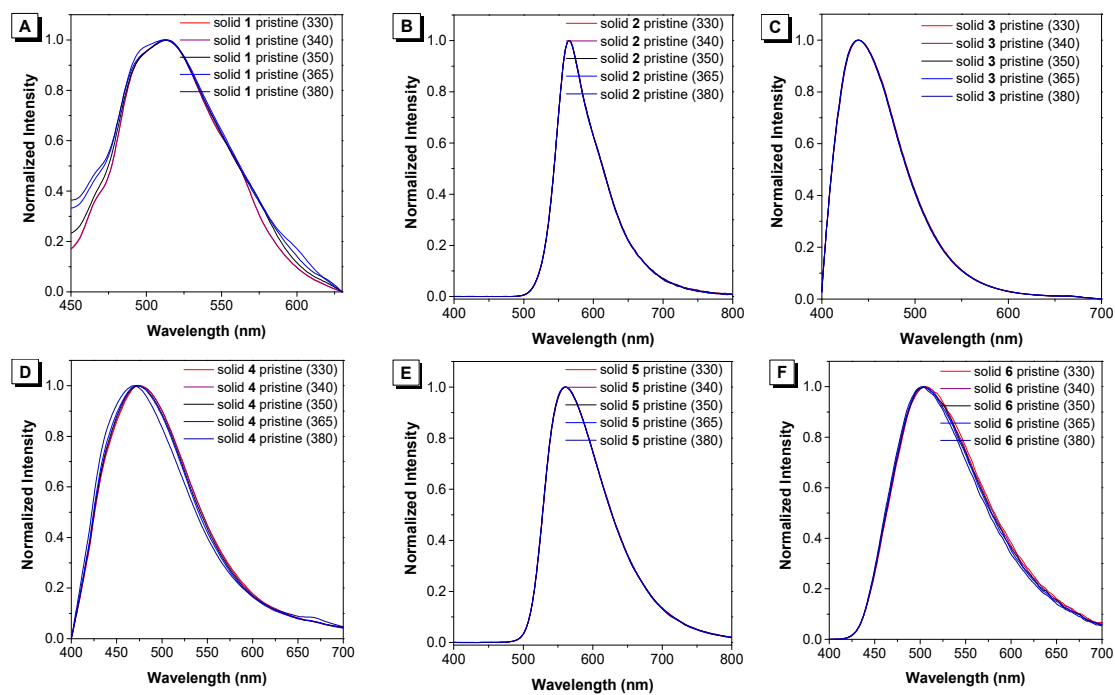

Figure S30. Normalized Intensity PL spectra of molecule 1-6 under the different excitation wavelength.

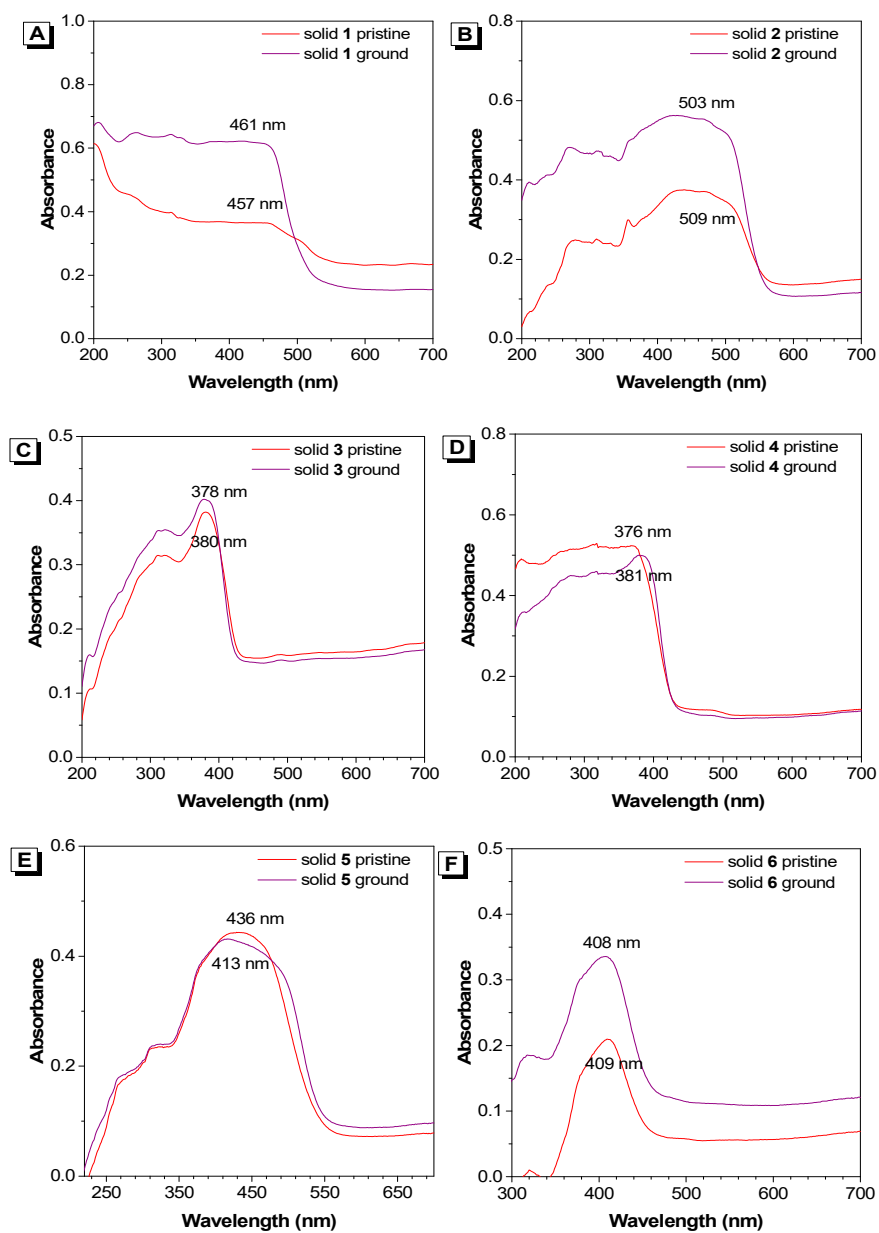

Figure S31. (A-F) UV-vis spectra of solids **1-6** before and after grinding.
